# Supplementary material for: The Effects of Multidisciplinary Team Meetings on Clinical Practice for Colorectal, Lung, Prostate and Breast Cancer: A Systematic Review
Source: MDPI journal article supplement (doi:10.3390/cancers13164159), 2021-08-18
Supplement: s1 [file s1]

# The Effects of Multidisciplinary Team Meetings on Clinical Practice for Colorectal, Lung, Prostate and Breast Cancer: A Systematic Review

Lejla Kočo <sup>1,\*</sup>, Harm H. A. Weekenstroom <sup>1,\*</sup>, Doenja M. J. Lambregts <sup>2</sup>, J. P. Michiel Sedelaar <sup>3</sup>, Mathias Prokop <sup>1</sup>, Jurgen J. Fütterer <sup>1</sup> and Ritse M. Mann <sup>1,2</sup>

**Table S1.** Database search string.

| Sub elements      | Mesh or Search term                                                                                                                                                                                                                                                                                                                                                                                                                                                                                                                                                                                                                                                                                                                                                                                                                                                                                                                                                                                                                                                                                                                                                                                                                     |
|-------------------|-----------------------------------------------------------------------------------------------------------------------------------------------------------------------------------------------------------------------------------------------------------------------------------------------------------------------------------------------------------------------------------------------------------------------------------------------------------------------------------------------------------------------------------------------------------------------------------------------------------------------------------------------------------------------------------------------------------------------------------------------------------------------------------------------------------------------------------------------------------------------------------------------------------------------------------------------------------------------------------------------------------------------------------------------------------------------------------------------------------------------------------------------------------------------------------------------------------------------------------------|
| Colorectal cancer | <i>Mesh:</i> Colorectal Neoplasms (pubmed), [Colorectal Neoplasms] explode all trees (Cochrane)                                                                                                                                                                                                                                                                                                                                                                                                                                                                                                                                                                                                                                                                                                                                                                                                                                                                                                                                                                                                                                                                                                                                         |
|                   | <i>Search terms:</i> Colorectal AND cancer/cancers/neoplasm/neoplasms/carcinoma/ carcinomas/tumor/tumors/tumour/tumours/malignancy/malignancies/adenocarcinoma/ adenocarcinomas                                                                                                                                                                                                                                                                                                                                                                                                                                                                                                                                                                                                                                                                                                                                                                                                                                                                                                                                                                                                                                                         |
| Lung cancer       | <i>Mesh:</i> “Lung Neoplasms” (pubmed) , [Lung Neoplasms] explode all trees (Cochrane)                                                                                                                                                                                                                                                                                                                                                                                                                                                                                                                                                                                                                                                                                                                                                                                                                                                                                                                                                                                                                                                                                                                                                  |
|                   | <i>Search terms:</i> Pulmonary/Lung AND cancer/cancers/neoplasm/neoplasms/carcinoma/ carcinomas/tumor/tumors/tumour/tumours/malignancy/malignancies/adenocarcinoma/ adenocarcinomas                                                                                                                                                                                                                                                                                                                                                                                                                                                                                                                                                                                                                                                                                                                                                                                                                                                                                                                                                                                                                                                     |
| Prostate cancer   | <i>Mesh:</i> “Prostatic Neoplasms” (pubmed) , [Prostatic Neoplasms] explode all trees (Cochrane)                                                                                                                                                                                                                                                                                                                                                                                                                                                                                                                                                                                                                                                                                                                                                                                                                                                                                                                                                                                                                                                                                                                                        |
|                   | <i>Search terms:</i> Prostate/Prostatic AND cancer/cancers/neoplasm/neoplasms/carcinoma/ carcinomas/tumor/tumors/tumour/tumours/malignancy/malignancies/adenocarcinoma/ adenocarcinomas                                                                                                                                                                                                                                                                                                                                                                                                                                                                                                                                                                                                                                                                                                                                                                                                                                                                                                                                                                                                                                                 |
| Breast cancer     | <i>Mesh:</i> “Breast Neoplasms” (pubmed) , [Breast Neoplasms] explode all trees (Cochrane)                                                                                                                                                                                                                                                                                                                                                                                                                                                                                                                                                                                                                                                                                                                                                                                                                                                                                                                                                                                                                                                                                                                                              |
|                   | <i>Search terms:</i> Breast/Mammary AND cancer/cancers/neoplasm/neoplasms/carcinoma/ carcinomas/tumor/tumors/tumour/tumours/malignancy/malignancies/adenocarcinoma/ adenocarcinomas                                                                                                                                                                                                                                                                                                                                                                                                                                                                                                                                                                                                                                                                                                                                                                                                                                                                                                                                                                                                                                                     |
| MDTM              | <i>Search terms:</i> Interdisciplinary approach, Interdisciplinary board, Interdisciplinary cancer conference, Interdisciplinary care, Interdisciplinary coordinated care, Interdisciplinary group, Interdisciplinary health care, Interdisciplinary healthcare, Interdisciplinary intervention, Interdisciplinary model, Interdisciplinary patient management, Interdisciplinary team, Interdisciplinary telecare, Interdisciplinary treatment, Interdisciplinary Health Team, MDT, MDTs, Multidisciplinary approach, Multidisciplinary board, Multidisciplinary cancer conference, Multidisciplinary care, Multidisciplinary coordinated care, Multidisciplinary group, Multidisciplinary health care, Multidisciplinary Health Team, Multidisciplinary healthcare, Multidisciplinary intervention, Multidisciplinary model, Multidisciplinary patient management, Multidisciplinary team, Multidisciplinary telecare, Multidisciplinary treatment, tumor board, tumour board, Interdisciplinary cancer care, interdisciplinary cancer, interdisciplinary management, interdisciplinary cancer management, Multidisciplinary cancer care, Multidisciplinary cancer, Multidisciplinary management, Multidisciplinary cancer management |

Search strategy used in the original (24-06-2019) and update searches (02-01-2020 and 05-01-2021).

**Table S2.** Search results per database.

| Database       | Date       | Results | Total |
|----------------|------------|---------|-------|
| Pubmed         | 24-06-2019 | 4144    | 4948  |
|                | 02-01-2020 | 321     |       |
|                | 05-01-2021 | 483     |       |
| Embase         | 24-06-2019 | 8195    | 10092 |
|                | 02-01-2020 | 890     |       |
|                | 05-01-2021 | 1007    |       |
| Cochrane       | 24-06-2019 | 827     | 1325  |
|                | 02-01-2020 | 321     |       |
|                | 05-01-2021 | 177     |       |
| Web of Science | 24-06-2019 | 3698    | 4547  |
|                | 02-01-2020 | 372     |       |
|                | 05-01-2021 | 477     |       |

Results of search strategy used in the original (24-06-2019) and update searches (02-01-2020 and 05-01-2021).

|                        | Confounding | Selection of Participants | Classification of interventions | Deviations of intervention | Missing Data   | Measurement of outcomes | Selection in Reported results | Overall bias   | Level of evidence |
|------------------------|-------------|---------------------------|---------------------------------|----------------------------|----------------|-------------------------|-------------------------------|----------------|-------------------|
| Acher et al.           | Low         | Low                       | No Information                  | No Information             | Low            | Serious                 | No Information                | Serious        | Very low          |
| Anania et al.          | Critical    | Moderate                  | Moderate                        | No Information             | Moderate       | Moderate                | Low                           | Critical       | Very low          |
| Boxer et al.           | Serious     | Moderate                  | Moderate                        | No Information             | Serious        | Moderate                | Low                           | Serious        | Very low          |
| Brandao et al.         | Serious     | Low                       | Moderate                        | Moderate                   | Serious        | Moderate                | Low                           | Serious        | Very low          |
| Bydder et al.          | Serious     | Moderate                  | Moderate                        | No Information             | Low            | Moderate                | Low                           | Serious        | Very low          |
| Chen et al.            | Critical    | Moderate                  | Moderate                        | No Information             | Moderate       | Moderate                | Low                           | Critical       | Very low          |
| Chinai et al.          | Low         | Low                       | No Information                  | No Information             | No Information | Critical                | Low                           | Critical       | Very low          |
| De Luca et al.         | Moderate    | Serious                   | Moderate                        | No Information             | Moderate       | Critical                | Low                           | Critical       | Very low          |
| El Khoury et al.       | Moderate    | Moderate                  | Moderate                        | No Information             | Low            | Critical                | Low                           | Critical       | Very low          |
| Fernando et al.        | Serious     | Serious                   | Moderate                        | No Information             | Low            | Critical                | Low                           | Critical       | Very low          |
| Freeman et al.         | Serious     | Moderate                  | Low                             | No Information             | Low            | Moderate                | Low                           | Serious        | Very low          |
| Foucan et al.          | Moderate    | Moderate                  | Low                             | No Information             | Serious        | Moderate                | Low                           | Serious        | Very low          |
| Hung et al.            | Critical    | Serious                   | Moderate                        | No Information             | No Information | Moderate                | Low                           | Critical       | Very low          |
| Jung et al.            | Serious     | Serious                   | Moderate                        | No Information             | Moderate       | Critical                | Low                           | Critical       | Very low          |
| Karagkounis et al.     | Moderate    | Moderate                  | Moderate                        | No Information             | Serious        | Critical                | Low                           | Critical       | Very low          |
| Kurpad et al.          | Moderate    | Low                       | Moderate                        | No Information             | Low            | Moderate                | Low                           | No Information | Low               |
| Lan et al.             | Critical    | Moderate                  | Moderate                        | No Information             | Moderate       | Moderate                | Low                           | Critical       | Very low          |
| Macdermid et al.       | Serious     | Moderate                  | Moderate                        | No Information             | Moderate       | Moderate                | Low                           | Serious        | Very low          |
| Maurizi et al.         | Serious     | Moderate                  | Moderate                        | No Information             | Low            | Moderate                | Low                           | Serious        | Very low          |
| Munro et al.           | Serious     | Critical                  | Serious                         | No Information             | Serious        | Moderate                | Low                           | Critical       | Very low          |
| Murthy et al.          | Low         | No Information            | Moderate                        | No Information             | Low            | No Information          | Low                           | No Information | Low               |
| Muthukrishnan et al.   | Moderate    | Serious                   | Moderate                        | No Information             | No Information | Moderate                | Low                           | Serious        | Very low          |
| Nikolovski et al.      | Critical    | Serious                   | Moderate                        | No Information             | Low            | Moderate                | Low                           | Critical       | Very low          |
| Palmer et al.          | Critical    | Moderate                  | Moderate                        | No Information             | Serious        | Moderate                | Low                           | Critical       | Very low          |
| Pan et al.             | Serious     | Moderate                  | No Information                  | No Information             | Low            | Moderate                | Low                           | Serious        | Very low          |
| Rao et al.             | Low         | Serious                   | Moderate                        | No Information             | Moderate       | Serious                 | Low                           | Serious        | Very low          |
| Richardson et al.      | Serious     | Low                       | Moderate                        | No Information             | Moderate       | Moderate                | Low                           | Serious        | Very low          |
| Ryan et al.            | Low         | Low                       | Moderate                        | No Information             | Low            | Serious                 | Low                           | Serious        | Very low          |
| Scarberry et al.       | Moderate    | Serious                   | Moderate                        | No Information             | Low            | Critical                | Low                           | Critical       | Very low          |
| Schmidt et al.         | Moderate    | Serious                   | Moderate                        | No Information             | No Information | Critical                | Low                           | Critical       | Very low          |
| Snelgrove et al.       | Low         | Serious                   | Moderate                        | Moderate                   | Low            | Critical                | Low                           | Critical       | Very low          |
| Stone et al.           | Serious     | Low                       | Moderate                        | No Information             | Serious        | Moderate                | Low                           | Serious        | Very low          |
| Swellengrebel et al.   | Critical    | Moderate                  | Moderate                        | No Information             | Serious        | Moderate                | Low                           | Critical       | Very low          |
| Tamburini et al.       | Critical    | Serious                   | Moderate                        | No Information             | Moderate       | Moderate                | Low                           | Critical       | Very low          |
| Tsai et al.            | Moderate    | Serious                   | Low                             | No Information             | Low            | Moderate                | Low                           | Serious        | Very low          |
| Ung et al.             | Low         | Serious                   | Moderate                        | No Information             | Serious        | Moderate                | Low                           | Serious        | Very low          |
| Vaughan-Shaw et al.    | Critical    | Moderate                  | Moderate                        | No Information             | No Information | Moderate                | Low                           | Critical       | Very low          |
| Wanis et al.           | Critical    | Serious                   | Moderate                        | No Information             | Moderate       | Moderate                | Low                           | Critical       | Very low          |
| Wille-Jorgensen et al. | Critical    | No Information            | Moderate                        | No Information             | Critical       | Moderate                | Low                           | Critical       | Very low          |
| Yang et al.            | Moderate    | Moderate                  | Moderate                        | No Information             | Moderate       | Serious                 | Low                           | Serious        | Very low          |
| Ye et al.              | Critical    | Serious                   | Moderate                        | No Information             | No Information | Moderate                | Low                           | Critical       | Very low          |

Low Moderate Serious Critical No Information

Figure S1. Risk of bias and quality of care.
